# Supplementary material
Source: bioRxiv or medRxiv preprint supplement (https://www.medrxiv.org/highwire/filestream/82773/field_highwire_adjunct_files/0/2020.05.25.20105213-1.zip)
Supplement: Supplementary file [file 2020.05.25.20105213-1.zip]

Table S1: Key epidemiological parameters used in the SEIHURD model, with their mean estimates and respective estimates obtained according to best fit for Salvador, inland cities and all Bahia state. The parameters interval was consolidated by Supplementary Table 2 and File 3.

| Parameter  | Description                                                    | Interval                                           | Fixed | Estimated (95% CI)<br>Bahia | Estimated (95% CI)<br>Salvador | Estimated (95% CI)<br>Interior<br>(95% CI) April 01 <sup>th</sup> |
|------------|----------------------------------------------------------------|----------------------------------------------------|-------|-----------------------------|--------------------------------|-------------------------------------------------------------------|
| $\beta_0$  | Pre-intervention transmission rate                             | [0, 2]                                             | -     | 1.06 (1.04 - 1.07)          | 1.24 (1.23 - 1.25)             | 0.95 (0.93 - 0.96)                                                |
| $\beta_1$  | Post-intervention transmission rate                            | [0, 2]                                             | -     | 0.63 (0.62 - 0.64)          | 0.59 (0.58 - 0.59)             | 0.63 (0.62 - 0.64)                                                |
| $t_1$      | Time of transmission rate change                               | [March 15 <sup>th</sup> , April 15 <sup>th</sup> ] | -     | March 28 <sup>th</sup>      | March 26 <sup>th</sup>         | April 01 <sup>th</sup>                                            |
| $\delta$   | Factor that reduce the asymptomatic infectivity                | [0, 0.7]                                           | -     | 0.62 (0.60 - 0.64)          | 0.55 (0.54 - 0.56)             | 0.57 (0.56 - 0.58)                                                |
| $p$        | Proportion of latent (E) that proceed to symptomatic infective | [0.13, 0.5]                                        | 0.2   | -                           | -                              | -                                                                 |
| $\kappa$   | Mean exposed period                                            | [1/6, 1/3]                                         | 1/4   | -                           | -                              | -                                                                 |
| $\gamma_a$ | Mean asymptomatic period                                       | [1/3.70, 1/3.24]                                   | 1/3.5 | -                           | -                              | -                                                                 |
| $\gamma_s$ | Mean symptomatic period                                        | [1/5, 1/3]                                         | 1/4   | -                           | -                              | -                                                                 |
| $h$        | Proportion of symptomatic needing hospitalization or ICU       | [0.05, 0.25]                                       | -     | 0.28 (0.28, 0.29)           | -                              | -                                                                 |
| $1 - \xi$  | Proportion of symptomatic that proceed to ICU                  | [0.01, 0.5]                                        | 0.47  | -                           | -                              | -                                                                 |
| $\gamma_H$ | Mean Hospital period                                           | [1/12, 1/4]                                        | -     | 0.14 (0.13, 0.14)           | -                              | -                                                                 |
| $\gamma_U$ | Mean ICU period                                                | [1/12, 1/3]                                        | -     | 0.14 (0.14, 0.15)           | -                              | -                                                                 |
| $\mu_H$    | Death rate of hospitalized individuals                         | [0.1, 0.2]                                         | 0.15  | -                           | -                              | -                                                                 |
| $\mu_U$    | Death rate of ICU individuals                                  | [0.4, 0.5]                                         | 0.4   | -                           | -                              | -                                                                 |
| $\omega_H$ | Proportion of hospitalized that goes to ICU                    | [0.1, 0.3]                                         | 0.14  | -                           | -                              | -                                                                 |
| $\omega_U$ | Proportion of ICU that goes to hospitalization                 | [0.1, 0.3]                                         | 0.29  | -                           | -                              | -                                                                 |
