# Supplementary material
Source: bioRxiv or medRxiv preprint supplement (https://www.medrxiv.org/highwire/filestream/82773/field_highwire_adjunct_files/0/2020.05.25.20105213-1.zip)
Supplement: Supplementary file [file 2020.05.25.20105213-1.zip]

Table S1: Epidemiological parameters associated to hospitalization dynamics of patients with Covid-19 from the Couto Maia Institut\*.

| Parameter  | Parameter search interval<br>(Couto Maia Institut) | PSO estimate |
|------------|----------------------------------------------------|--------------|
| $1 = \xi$  | 0.50                                               | 0.47         |
| $\gamma_H$ | $[1/20, 1]$                                        | 0.14         |
| $\gamma_U$ | $[1/20, 1]$                                        | 0.14         |
| $\mu_H$    | 0.11                                               | 0.15         |
| $\mu_U$    | 0.23                                               | 0.40         |
| $\omega_H$ | 0.14                                               | 0.14         |
| $\omega_U$ | 0.29                                               | 0.29         |

\* The mean hospital period,  $\gamma_H$ , is 4.3 days and the mean ICU period,  $\gamma_H$ , is 4.7 days.
