# Supplementary material
Source: bioRxiv or medRxiv preprint supplement (https://www.medrxiv.org/highwire/filestream/82773/field_highwire_adjunct_files/0/2020.05.25.20105213-1.zip)
Supplement: Supplementary file [file 2020.05.25.20105213-1.zip]

# Evaluating the burden of COVID-19 on hospital resources in Bahia, Brazil: A modelling-based analysis of 14.8 million individuals

**Juliane F. Oliveira<sup>1,2,\*</sup>, Daniel C. P. Jorge<sup>3</sup>, Rafael V. Veiga<sup>1</sup>, Moreno S. Rodrigues<sup>4</sup>, Matheus F. Torquato<sup>5</sup>, Nívea B. da Silva<sup>6</sup>, Rosemeire L. Fiaconne<sup>6</sup>, Caio P. Castro<sup>3</sup>, Aureliano S. S. Paiva<sup>1</sup>, Luciana L. Cardim<sup>1</sup>, Alan A. S. Amad<sup>5</sup>, Ernesto A. B. F. Lima<sup>7</sup>, Diego S. Souza<sup>1</sup>, Suani T. R. Pinho<sup>3,\*\*</sup>, Pablo I. P. Ramos<sup>1,\*\*</sup>, Roberto F. S. Andrade<sup>1,3,\*\*</sup>, Rede CoVida Modelling Task-force<sup>8</sup>**

<sup>1</sup>Center of Data and Knowledge Integration for Health (CIDACS), Instituto Gonçalo Moniz, Fundação Oswaldo Cruz, Salvador, Bahia, Brazil

<sup>2</sup>Centre of Mathematics of the University of Porto (CMUP), Department of Mathematics, Porto, Portugal

<sup>3</sup>Instituto de Física, Universidade Federal da Bahia, Salvador, Bahia, Brazil

<sup>4</sup>Fundação Oswaldo Cruz, Porto Velho, Rondônia, Brazil

<sup>5</sup>College of Engineering, Swansea University, Swansea, Wales, United Kingdom

<sup>6</sup>Instituto de Matemática e Estatística, Universidade Federal da Bahia, Salvador, Bahia, Brazil

<sup>7</sup>Oden Institute for Computational Engineering and Sciences, The University of Texas at Austin, Austin, Texas, United States of America

<sup>8</sup>Group members and affiliations are listed in the supplementary materials: Ceuci Nunes, Gervásio F. Santos, José G. B. Castro, José G. V. Miranda, Luis Eugênio, Maira L. Souza, Maria Y. Ichihara, Mateus S. Silva, Maurício L. Barreto, Raphael S. do Rosário, Vivian A. F. Silva

\*Correspondence: Juliane F. Oliveira (julianlanzin@gmail.com).

\*\*These authors contributed equally to this work.

## ABSTRACT



## Supplementary file 1: Differential Equations extended

$$\frac{dS}{dt} = \frac{-\beta(t)S(I_s + \delta I_a)}{N} \quad (1)$$

$$\frac{dE}{dt} = \frac{\beta(t)S(I_s + \delta I_a)}{N} - \kappa E \quad (2)$$

$$\frac{dI_a}{dt} = (1-p)\kappa E - \gamma_a I_a \quad (3)$$

$$\frac{dI_s}{dt} = p\kappa E - \underbrace{(1-h)\gamma_s I_s}_{\text{recover: no need of H or U}} - \underbrace{h\xi\gamma_s I_s}_{\text{go to H}} - \underbrace{h(1-\xi)\gamma_s I_s}_{\text{go to U}} \quad (4)$$

$$\frac{dH}{dt} = h\xi\gamma_s I_s + \underbrace{\omega_U \gamma_U U}_{\text{came from U}} + \underbrace{(1-\omega_U)(1-\mu_U)\gamma_U U}_{\text{came from U}} - \underbrace{\omega_H \gamma_H H}_{\text{go to U}} - \underbrace{(1-\omega_H)(1-\mu_H)\gamma_H H}_{\text{recover}} - \underbrace{(1-\omega_H)\mu_H \gamma_H H}_{\text{Die}} \quad (5)$$

$$\frac{dU}{dt} = h(1-\xi)\gamma_s I_s + \underbrace{\omega_H \gamma_H H}_{\text{came from H}} - \underbrace{\omega_U \gamma_U U}_{\text{go to H}} - \underbrace{(1-\omega_U)\mu_U \gamma_U U}_{\text{die}} - \underbrace{(1-\omega_U)(1-\mu_U)\gamma_U U}_{\text{Came back to H before recover}} \quad (6)$$

$$\frac{dR}{dt} = \gamma_a I_a + (1-h)\gamma_s I_s + (1-\mu_H)(1-\omega_H)\gamma_H H \quad (7)$$

$$\frac{dD}{dt} = (1-\omega_H)\mu_H \gamma_H H + (1-\omega_U)\mu_U \gamma_U U \quad (8)$$

Simplifying, Eq(4) became:

$$-(1-h)\gamma_s I_s - h\xi\gamma_s I_s - h(1-\xi)\gamma_s I_s = -(1-h)\gamma_s I_s - h\xi\gamma_s I_s - h\gamma_s I_s + h\xi\gamma_s I_s \quad (9)$$

$$= -(1-h)\gamma_s I_s - h\gamma_s I_s \quad (10)$$

$$= \gamma_s I_s. \quad (11)$$

Therefore  $\frac{dI_s}{dt} = p\kappa E - \gamma_s I_s$ .

In Eq(5) we have:

$$\omega_U \gamma_U U + (1-\omega_U)(1-\mu_U)\gamma_U U - \omega_H \gamma_H H - (1-\omega_H)(1-\mu_H)\gamma_H H - (1-\omega_H)\mu_H \gamma_H H \quad (12)$$

$$= \omega_U \gamma_U U + (1-\omega_U)\gamma_U U - (1-\omega_U)\mu_U \gamma_U U - \omega_H \gamma_H H - (1-\omega_H)\gamma_H H + (1-\omega_H)\mu_H \gamma_H H - (1-\omega_H)\mu_H \gamma_H H \quad (13)$$

$$= \omega_U \gamma_U U + \gamma_U U - \omega_U \gamma_U U - (1-\omega_U)\mu_U \gamma_U U - \omega_H \gamma_H H - \gamma_H H + \omega_H \gamma_H H \quad (14)$$

$$= \gamma_U U - (1-\omega_U)\mu_U \gamma_U U - \gamma_H H \quad (15)$$

$$= (1-\mu_U + \omega_U \mu_U)\gamma_U U - \gamma_H H. \quad (16)$$

Thus,  $\frac{dH}{dt} = h\xi\gamma_s I_s + (1-\mu_U + \omega_U \mu_U)\gamma_U U - \gamma_H H$ .

To conclude, Eq(6) yields:

$$- \omega_U \gamma_U U - (1-\omega_U)\mu_U \gamma_U U - (1-\omega_U)(1-\mu_U)\gamma_U U \quad (17)$$

$$= - \omega_U \gamma_U U - (1-\omega_U)\mu_U \gamma_U U - (1-\omega_U)\gamma_U U + (1-\omega_U)\mu_U \gamma_U U \quad (18)$$

$$= - \omega_U \gamma_U U - (1-\omega_U)\gamma_U U \quad (19)$$

$$= - \gamma_U U. \quad (20)$$

Thus,  $\frac{dU}{dt} = h(1-\xi)\gamma_s I_s + \omega_H \gamma_H H - \gamma_U U$ .
