# Supplementary material
Source: bioRxiv or medRxiv preprint supplement (https://www.medrxiv.org/highwire/filestream/82773/field_highwire_adjunct_files/0/2020.05.25.20105213-1.zip)
Supplement: Supplementary file [file 2020.05.25.20105213-1.zip]

# Evaluating the burden of COVID-19 on hospital resources in Bahia, Brazil: A modelling-based analysis of 14.8 million individuals

Juliane F. Oliveira<sup>1,2,\*</sup>, Daniel C. P. Jorge<sup>3</sup>, Rafael V. Veiga<sup>1</sup>, Moreno S. Rodrigues<sup>4</sup>, Matheus F. Torquato<sup>5</sup>, Nívea B. da Silva<sup>6</sup>, Rosemeire L. Fiaconne<sup>6</sup>, Caio P. Castro<sup>3</sup>, Aureliano S. S. Paiva<sup>1</sup>, Luciana L. Cardim<sup>1</sup>, Alan A. S. Amad<sup>5</sup>, Ernesto A. B. F. Lima<sup>7</sup>, Diego S. Souza<sup>1</sup>, Suani T. R. Pinho<sup>3,\*\*</sup>, Pablo I. P. Ramos<sup>1,\*\*</sup>, Roberto F. S. Andrade<sup>1,3,\*\*</sup>, Rede CoVida Modelling Task-force<sup>8</sup>

<sup>1</sup>Center of Data and Knowledge Integration for Health (CIDACS), Instituto Gonalo Moniz, Fundao Oswaldo Cruz, Salvador, Bahia, Brazil

<sup>2</sup>Centre of Mathematics of the University of Porto (CMUP), Department of Mathematics, Porto, Portugal

<sup>3</sup>Instituto de Fsica, Universidade Federal da Bahia, Salvador, Bahia, Brazil

<sup>4</sup>Fundao Oswaldo Cruz, Porto Velho, Rondnia, Brazil

<sup>5</sup>College of Engineering, Swansea University, Swansea, Wales, United Kingdom

<sup>6</sup>Instituto de Matemtica e Estatstica, Universidade Federal da Bahia, Salvador, Bahia, Brazil

<sup>7</sup>Oden Institute for Computational Engineering and Sciences, The University of Texas at Austin, Austin, Texas, United States of America

<sup>8</sup>Group members and affiliations are listed in the supplementary materials: Ceuci Nunes, Gervsio F. Santos, Jos G. B. Castro, Jos G. V. Miranda, Luis Eugnio, Maira L. Souza, Maria Y. Ichihara, Mateus S. Silva, Maurcio L. Barreto, Raphael S. do Rosrio, Vivian A. F. Silva

\*Correspondence: Juliane F. Oliveira (julianlanzin@gmail.com).

\*\*These authors contributed equally to this work.

## ABSTRACT

Supplementary file 2: Parameter sensitivity analysis

## Supplementary file 2: Parameter sensitivity analysis

Sensitivity analysis was conducted to assess the effects of model parameters in the dynamics of  $I_a$ ,  $I_s$ ,  $U$ ,  $H$  and  $D$  over time. By using an statistical variance-based method, described by Sobol<sup>1</sup>, the sensitivity analysis of the system described by Eqs.(2)-(9) in the main text, considers the following parameter vector

$$\theta := (\beta_0, \beta_1, \gamma_H, \gamma_U, \delta, h, t_1, k) \in \mathbb{R}^8, \quad (1)$$

and assumes that its elements are uniformly distributed in proper intervals as follows:

$$\begin{aligned} \beta_0 &\sim \mathcal{U}(0, 2), & \beta_1 &\sim \mathcal{U}(0, 2), & \gamma_H &\sim \mathcal{U}(1/12, 1/4), & \gamma_U &\sim \mathcal{U}(1/12, 1/3), \\ \delta &\sim \mathcal{U}(0, 0.7), & h &\sim \mathcal{U}(0.05, 0.25), & t_1 &\sim \mathcal{U}(0, 30), & k &\sim \mathcal{U}(0, 100). \end{aligned} \quad (2)$$

This method is divided in two steps. The first one consists in generating the sample values for the input factors in Eq. (1) by creating matrices  $A$  and  $B$ , each one with size  $N \times n$ , where  $N$  is the number of samples and  $n = 8$  is the number of parameters being analyzed, given by

$$A = \begin{pmatrix} \theta_1^{(A1)} & \theta_2^{(A1)} & \dots & \theta_i^{(A1)} & \dots & \theta_n^{(A1)} \\ \theta_1^{(A2)} & \theta_2^{(A2)} & \dots & \theta_i^{(A2)} & \dots & \theta_n^{(A2)} \\ \vdots & \vdots & \dots & \vdots & \dots & \vdots \\ \theta_1^{(AN)} & \theta_2^{(AN)} & \dots & \theta_i^{(AN)} & \dots & \theta_n^{(AN)} \end{pmatrix} \quad (3)$$

and

$$B = \begin{pmatrix} \theta_1^{(B1)} & \theta_2^{(B1)} & \dots & \theta_i^{(B1)} & \dots & \theta_n^{(B1)} \\ \theta_1^{(B2)} & \theta_2^{(B2)} & \dots & \theta_i^{(B2)} & \dots & \theta_n^{(B2)} \\ \vdots & \vdots & \dots & \vdots & \dots & \vdots \\ \theta_1^{(BN)} & \theta_2^{(BN)} & \dots & \theta_i^{(BN)} & \dots & \theta_n^{(BN)} \end{pmatrix}. \quad (4)$$

Then,  $n$  matrices  $A_B^i$  are created, where column  $i$  comes from matrix  $B$  and all other  $n - 1$  columns come from matrix  $A$

$$A_B^i = \begin{pmatrix} \theta_1^{(A1)} & \theta_2^{(A1)} & \dots & \theta_i^{(B1)} & \dots & \theta_n^{(A1)} \\ \theta_1^{(A2)} & \theta_2^{(A2)} & \dots & \theta_i^{(B2)} & \dots & \theta_n^{(A2)} \\ \vdots & \vdots & \dots & \vdots & \dots & \vdots \\ \theta_1^{(AN)} & \theta_2^{(AN)} & \dots & \theta_i^{(BN)} & \dots & \theta_n^{(AN)} \end{pmatrix}$$

In the matrices  $A$ ,  $B$  and  $A_B^i$ , each row represents a set of parameter to be used as an input for the model. Numerical simulations are performed, and the output of the sample matrices  $A$ ,  $B$  and  $A_B^i$  are stored as the vectors

$$Y_A = \begin{pmatrix} Y(A^{(A1)}) \\ Y(A^{(A2)}) \\ \vdots \\ Y(A^{(AN)}) \end{pmatrix}; \quad Y_B = \begin{pmatrix} Y(B^{(B1)}) \\ Y(B^{(B2)}) \\ \vdots \\ Y(B^{(BN)}) \end{pmatrix}; \quad Y_{A_B^i}. \quad (5)$$

where  $Y_A$ ,  $Y_B$  and  $Y_{A_B^i}$  are output vectors.

The final step is to calculate the sensitivity indices, using the samples generated from the sampling scheme. In this work, we are interested in computing the total effect indices, given by

$$S_{T_i} = 1 - \frac{Y_A \cdot Y_B - f^2}{Y_A \cdot Y_A - f^2} \quad (6)$$

where  $f$  is defined as

$$f := \frac{1}{N} \sum_{j=1}^N Y_A^{(j)}. \quad (7)$$

The total effect index indicates the contribution of the parameter to the output of the model. The importance of the parameter is proportional to the value of  $S_{T_i}$ , meaning that higher  $S_{T_i}$  leads to a higher contribution to the model output<sup>2</sup>. Parameters with higher  $S_T$  need a more carefully calibration, as small error during the calibration can lead to bigger errors to the model prediction.

In Figure 1, the result of the sensitivity analysis over time is presented. The numerical simulations were performed using SALib library<sup>3</sup>. The experiment was conducted generating  $N = 12000$  samples and the result shows the evolution of the parameters according to  $I_a$ ,  $I_s$ ,  $U$ ,  $H$  and  $D$  compartments. The results of the sensitivity analysis indicate that the factor that reduce the asymptomatic infectivity,  $\delta$ , is among the most influential parameters to every model output during the whole period evaluated (i.e., 70 days). The analysis also indicates that during the first 30 days  $\beta_0$  is the most important parameters in the system, as indicated by higher values of  $S_T$ . After this period, the importance of  $\beta_0$  decreases, and  $\beta_1$  becomes the most important parameter in the system. For  $H$ ,  $U$ , and  $D$ , the most influential parameter during the initial stages of the simulation (i.e., before day 15) is the proportion of symptomatic needing hospitalization or ICU,  $h$ . From these results we are able to conclude that a carefully characterization of the parameters  $\delta$ ,  $\beta_0$ ,  $\beta_1$ , and  $h$  is needed. Finally, the sensitivity index of the  $k$  parameter in all cases is close to zero, which means that it can be fixed.

## References

1. Sobol, I. M. Global sensitivity indices for nonlinear mathematical models and their Monte-Carlo estimates. *Math. Comput. Simul.* **55**, 271–280 (2001).
2. Saltelli, A. et al. *Global Sensitivity Analysis: The Primer* (John Wiley & Sons, 2008).
3. Herman, J. & Usher, W. SALib: An open-source python library for sensitivity analysis. *The J. Open Source Softw.* **2**, DOI: [10.21105/joss.00097](https://doi.org/10.21105/joss.00097) (2017).

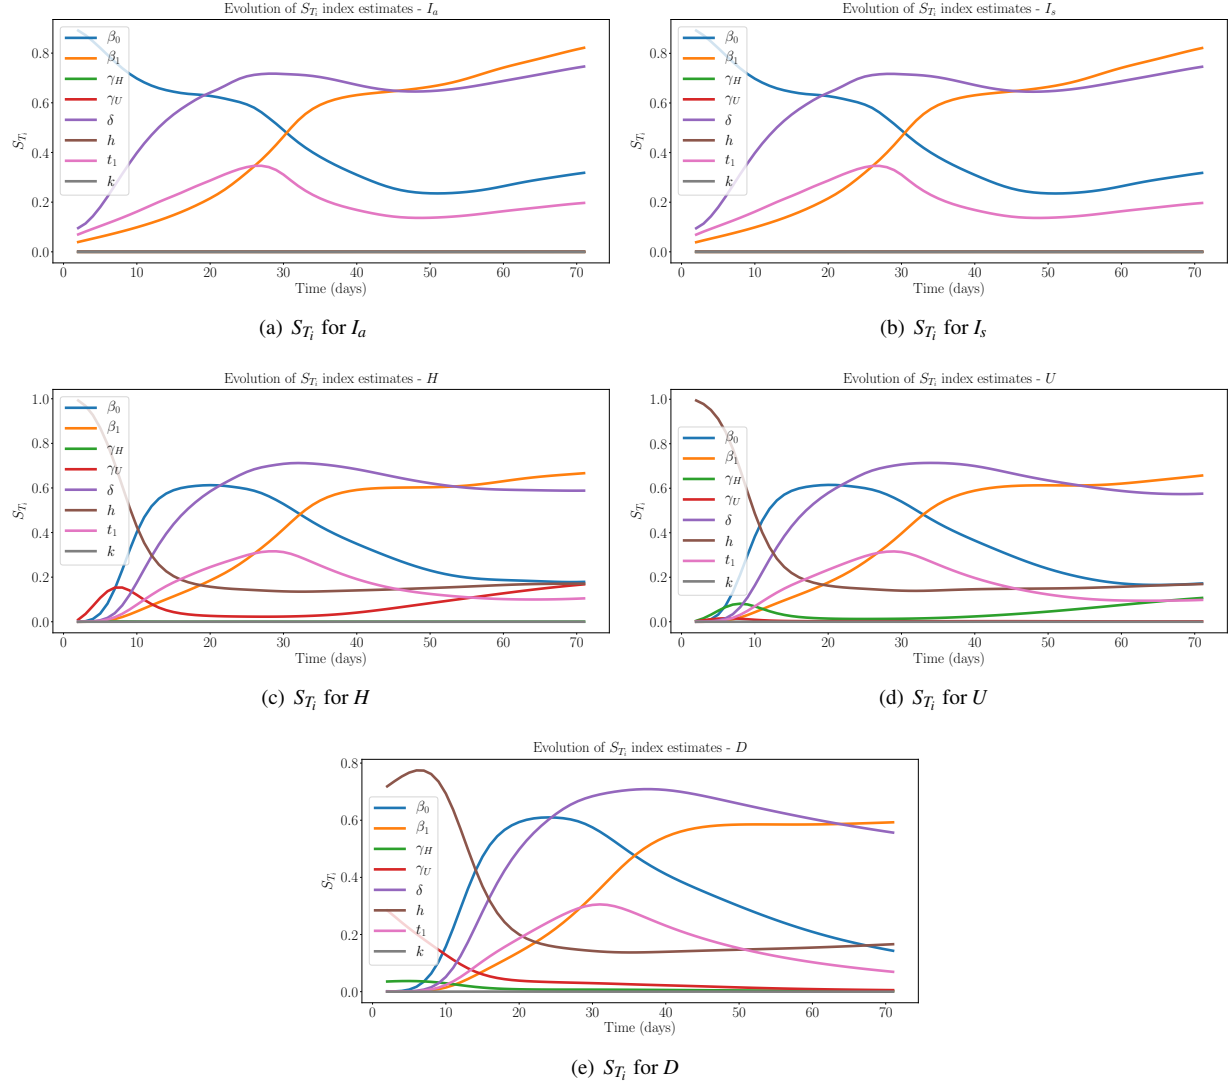

**Figure 1.** Sensitivity analysis study for  $I_a$ ,  $I_s$ ,  $U$ ,  $H$  and  $D$  compartments over time. The analysis of the total effect index,  $S_T$ , for the 8 parameters evaluated, indicates that  $\delta$ ,  $\beta_0$ ,  $\beta_1$ , and  $h$  are the most influential parameters to the model output. Also, the mean exposed period,  $k$ , is the less influential parameter, indicated by the low  $S_T$ .
